# Supplementary material
Source: publisher site journal article supplement (https://www.dovepress.com/article/304128)
Supplement: Supplementary file 1 [file get_supplementary_file.php]

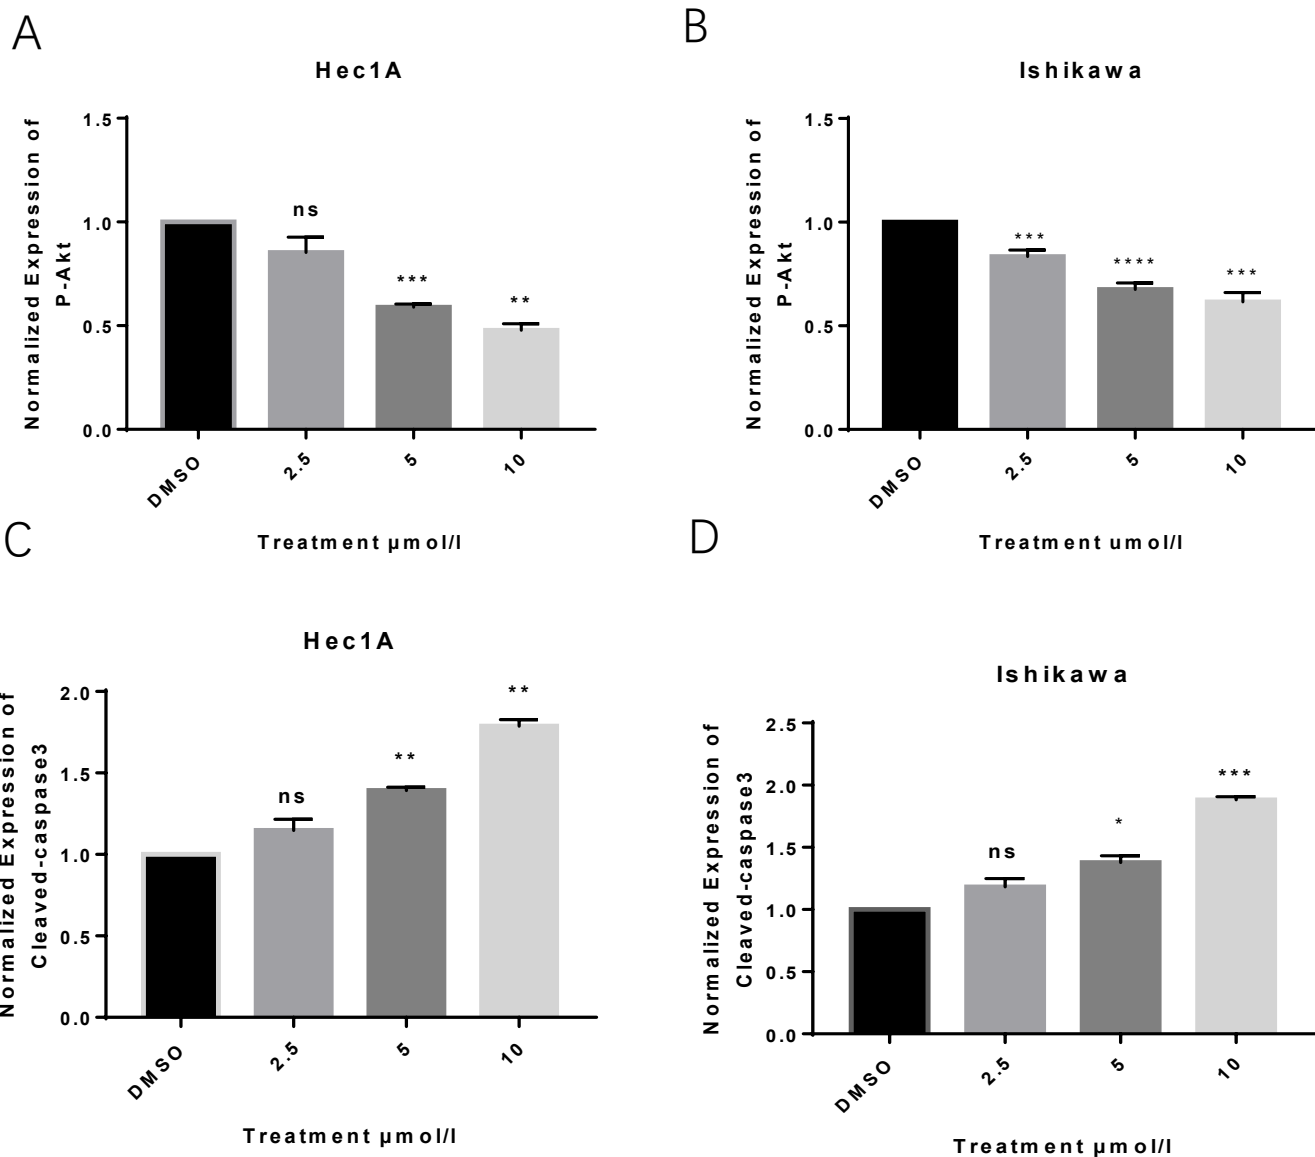

Figure S1.OSU03012 disrupts Akt signaling and induces apoptosis in human EC cells. (A-D) Bar graphs showing quantification of western blot analysis p-Akt and cleaved caspase-3 levels in HEC-1A (A,C) and Ishikawa(B,D) Data represent with three independent experiments in triplicates. Data was expressed as mean  $\pm$  SD. T-test was used for the statistical analysis versus the control group. \* $p < 0.05$ , \*\* $p < 0.01$ , \*\*\* $p < 0.001$ , \*\*\*\* $p < 0.0001$ , ns (Non-significant difference,  $p > 0.05$ ).
